# Supplementary material
Source: Springer Nature journal article supplement (https://www.springermedizin.de/resource/supplementary/12905_2012_281_MOESM1_ESM.pdf/9518360)

Total daily energy intake (Kcal)

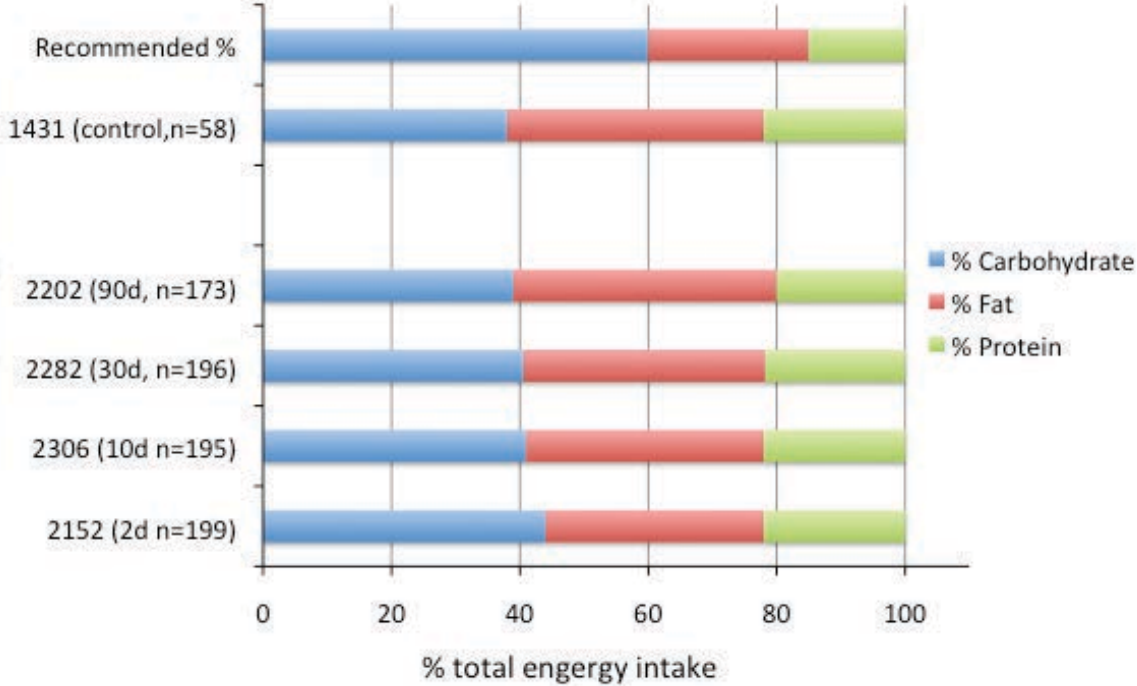

Supplement: MOESM1 [file 9518360]
